# Supplementary material for: A ratiometric luminescence thermometer based on lanthanide encapsulated complexes
Source: Royal Society of Chemistry journal article supplement (doi:10.1039/d4dt02639j), 2024-10-29
Supplement: d4dt02639j1.pdf [file d4dt02639j1.pdf]

## Supporting Information

### A ratiometric luminescence thermometer based on lanthanide encapsulated complexes

Aribam Rishikanta Sharma,<sup>at</sup> Atom Rajiv Singh,<sup>at</sup> Anju Ajayan Kongasseri,<sup>b</sup> Swadhin Garain,<sup>c</sup> Ann Mariella Babu,<sup>d</sup> Rajkumari Lonibala<sup>\*a</sup> and Raju Laishram<sup>\*a</sup>

<sup>a</sup>. *Department of Chemistry, Manipur University, Manipur – 795003, India.*

<sup>b</sup>. *New Chemistry Unit and School of Advanced Materials, Jawaharlal Nehru Centre for Advanced Scientific Research (JNCASR) Jakkur, Bangalore 560064, India.*

<sup>c</sup>. *University of Würzburg, Würzburg, Germany.*

<sup>d</sup>. *Christ University, Bengaluru, 560029, India.*

<sup>†</sup>*Both Authors Contributed Equally*

Email: [rajulaishram007@gmail.com](mailto:rajulaishram007@gmail.com)

#### Chemicals.

All the chemicals were brought commercially and were used as received with no further purification. 5-amino isophthalic acid (Sigma Aldrich), Calcium Acetate (Loba Chemie), Terbium Chloride Hexahydrate (SRL), Europium Chloride Hexahydrate (Sigma Aldrich), N, N-Dimethylacetamide (SDFCL), Ethanol (Analytical CS) and methanol (Merck).

#### Characterization and Photoluminescence Measurement.

Powder X-ray diffraction patterns were recorded using PAN analytical powder diffractometer (X'Pert PRO) with CuK $\alpha$  (1.5405Å) radiation (40kV and 30mA) having a step size of 0.02 and with scan step time 0.3 s in the angular range of  $2\theta = 10^\circ \leq 2\theta \leq 80^\circ$ . Fourier transform infrared spectra (FTIR) for the samples were also measured using SHIMADZU IRAffinity-1S spectrometer. Photoluminescence Emission Spectra, Excitation Spectra, Emission Lifetime and Quantum Yield were recorded using an Edinburgh FLS1000 Fluorimeter equipped with Multichannel Scaling (MCS) and Integrating Sphere. The measurements were carried out from 40 K to 380 K. Time-dependent Photoluminescence Emission Spectra of CAT was measured in Agilent Cary-Eclipse Fluorescence Spectrophotometer.

#### Encapsulation details

TbCl<sub>3</sub> (60 mM), EuCl<sub>3</sub> (60 mM) and CA (0.6M) solution were prepared in methanol. The prepared samples were mixed as per the conditions given in Table SI1.

## Supporting Tables and Figures

**Table S11** Encapsulation conditions

| Sample Name | CA (ml) | Tb (ml) | Eu (ml) | Tb : Eu Ratio |
|-------------|---------|---------|---------|---------------|
| CAT         | 1.2     | 2.4     | 0       | 5:0           |
| CATE1       | 1.2     | 2.4     | 0.24    | 5:0.5         |
| CATE2       | 1.2     | 2.4     | 0.48    | 5:1           |
| CATE        | 1.2     | 2.4     | 0.96    | 5:2           |

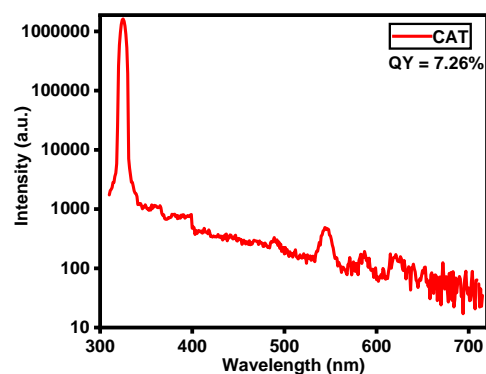

**Fig. S11** Quantum yield data of CAT

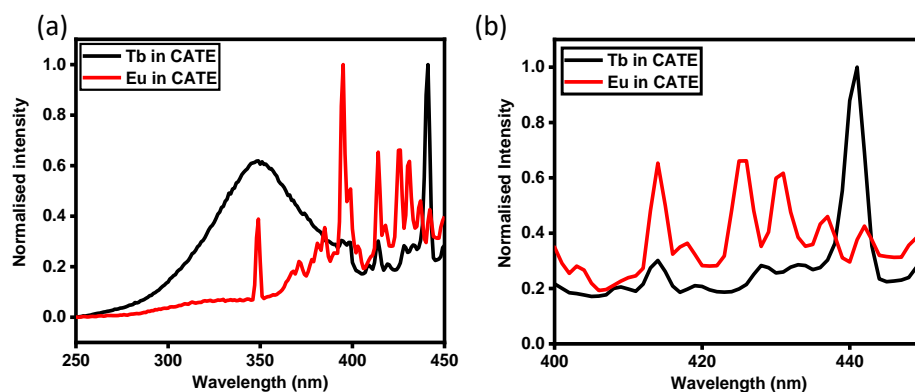

**Fig. S12** (a) Excitation spectra of Tb and Eu in CATE (b) Expansion of (a) from 400 nm to 450 nm

**Table S12** Lifetime data for Tb in CAT and Tb and Eu in CATE

| Samples    | $\tau_1$ ms (%) | $\tau_2$ ms (%) | $\tau_3$ ms (%) | Intensity average lifetime, $\tau_{avg}$ . | $\chi^2$ |
|------------|-----------------|-----------------|-----------------|--------------------------------------------|----------|
| Tb in CAT  | 0.05<br>(20.96) | 0.15<br>(34.67) | 0.72<br>(44.37) | 0.63                                       | 1.19     |
| Tb in CATE | 0.01<br>(14.25) | 0.08<br>(22.65) | 0.56<br>(63.09) | 0.53                                       | 1.20     |
| Eu in CATE | 0.01<br>(2.09)  | 0.41<br>(67.05) | 1.34<br>(30.86) | 0.97                                       | 1.23     |

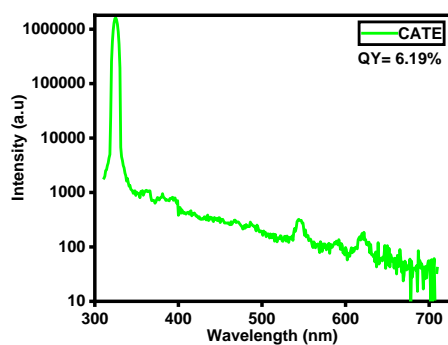

Fig. S13 Quantum yield data of CATE

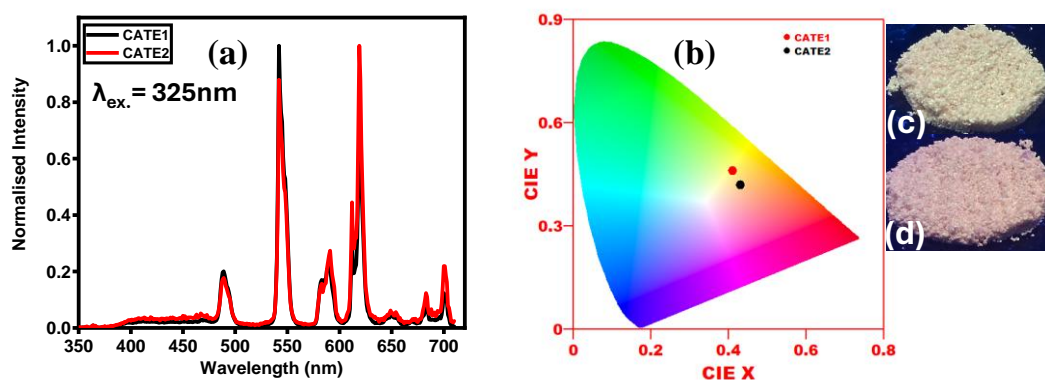

Fig. S14 (a) Emission spectra of CATE1 and CATE2 ( $\lambda_{\text{ex}}=325\text{ nm}$ ) (b) CIE diagram of CATE1 and CATE2 (c)-(d) Photograph of CATE1 and CATE2 under UV lamp.

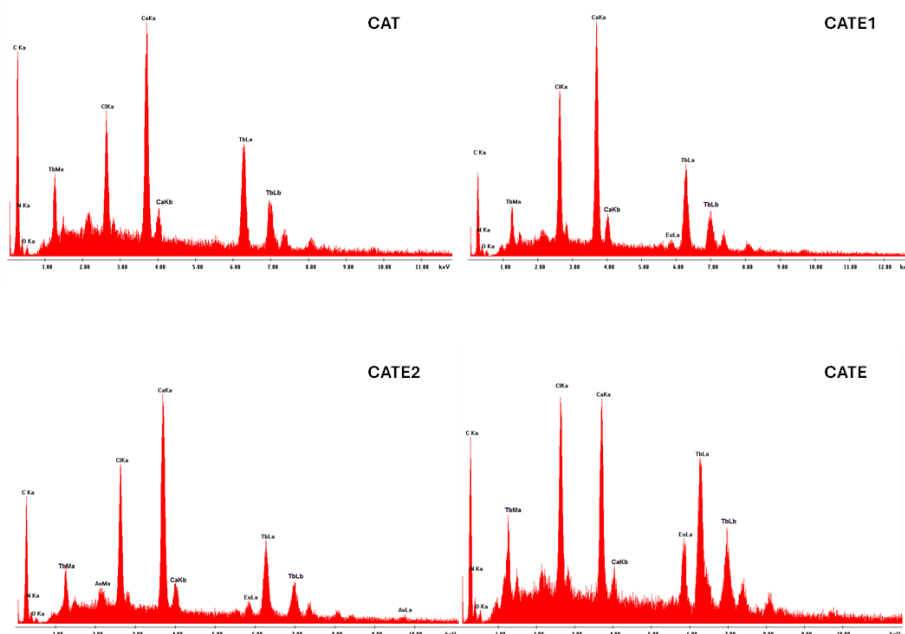

Fig. S15 EDX graph for CAT, CATE1, CATE2 and CATE

Note: In CAT, no Eu was present. For CATE with different Tb/Eu ratios, the amount we have added matches closely with EDX data from the synthesis complexes.

Table S13 Different Metal percentage

| Sample                | Eu % w.r.t. Tb added (theoretical) | Eu % w.r.t. Tb from EDX (experimental) | Ca:Tb: Eu % |
|-----------------------|------------------------------------|----------------------------------------|-------------|
| CAT (Tb:Eu. 5:0)      | 0                                  | 0                                      | 22:78:0     |
| CATE1 (Tb:Eu , 5:0.5) | 9.09 %                             | 8.23 %                                 | 26:68:6     |
| CATE2 (Tb:Eu, 5:1)    | 16.66 %                            | 13.99 %                                | 27:63:10    |
| CATE (Tb:Eu, 5:2)     | 28.57 %                            | 27.57 %                                | 12:64:24    |

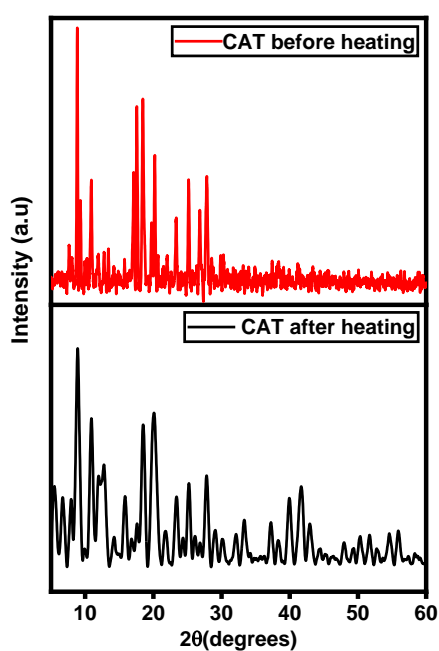

Fig. S16 pXRD of CAT before and after heating

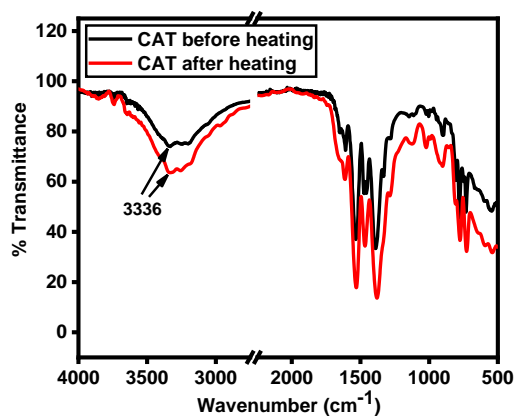

Fig. S17 IR Spectra of CAT before and after heating

**Table SI4** Temperature parameters for different sample

| Samples         | Thermometric parameter ( $\Delta$ ) | Maximum Sensitivity ( $S_m$ ) | Temperature uncertainty range ( $\delta T$ ) |
|-----------------|-------------------------------------|-------------------------------|----------------------------------------------|
| CAT (CA vs Tb)  | 160 K – 380 K                       | 0.95 % $K^{-1}$               | 0.03 K – 0.25 K                              |
| CATE (CA vs Tb) | 160 K – 380 K                       | 0.76% $K^{-1}$                | 0.03 K – 0.46 K                              |
| CATE (Tb vs Eu) | 280 K – 380 K                       | 1.03% $K^{-1}$                | 0.03 K – 0.31 K                              |
| CATE (CA vs Eu) | 160 K – 380 K                       | 1.11% $K^{-1}$                | 0.02 K – 0.51 K                              |

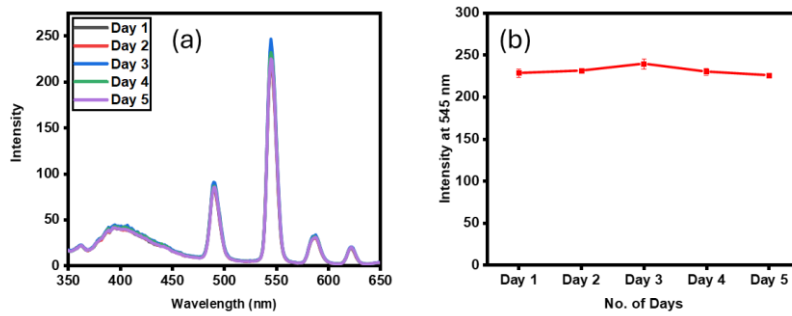

**Fig. S18** (a) Emission Spectra of CAT on storage and (b) Intensity of Tb with storage

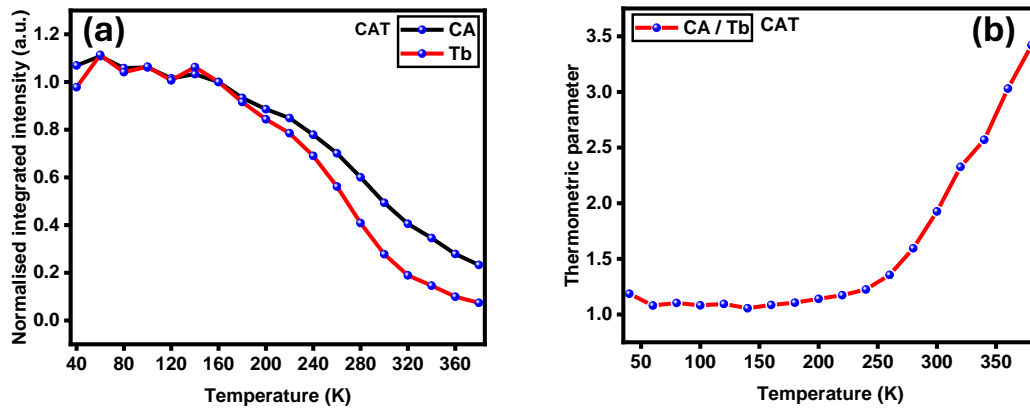

**Fig. S19** (a) Normalized integrated intensity comparison for CA and Tb in CAT. (b) Thermometric parameter for CA / Tb in CAT.

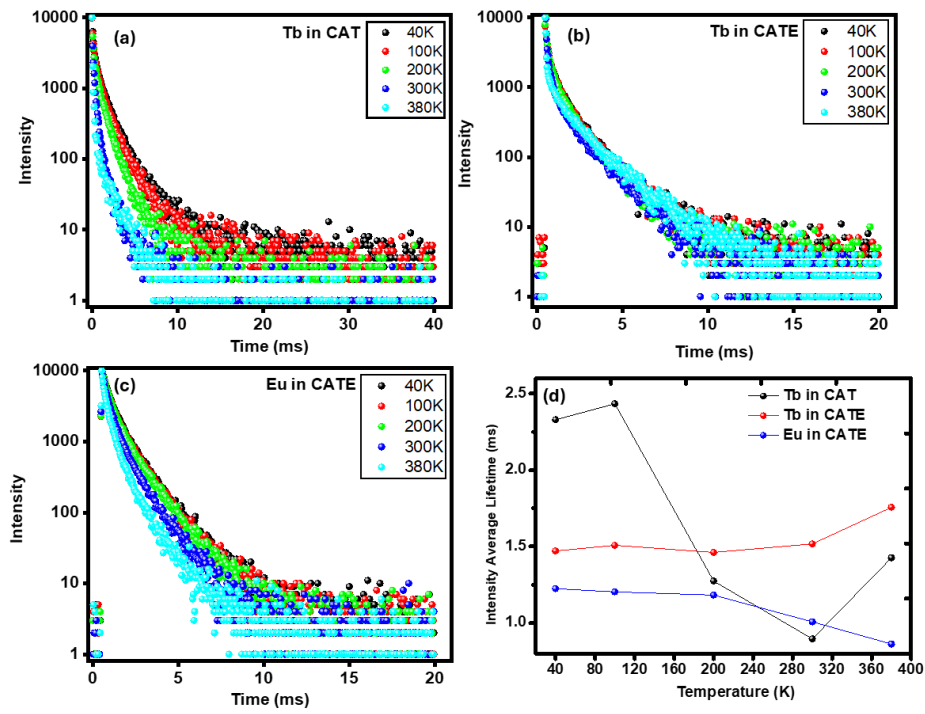

**Fig. SI10** (a) Luminescence Lifetime of Tb in CAT (b) Luminescence Lifetime of Tb in CATE (c) Luminescence Lifetime of Eu in CATE (d) Intensity lifetime of Tb and Eu in CAT and CATE with temperature

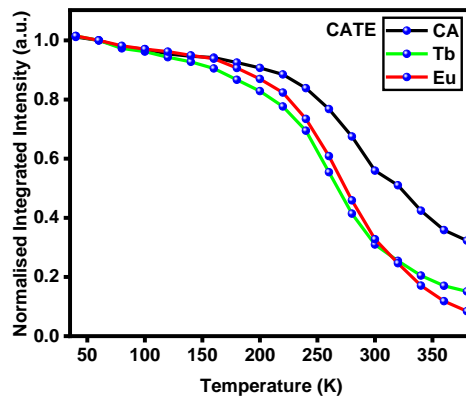

**Fig. SI11** Normalized integrated intensity comparison for CA, Tb and Eu in CATE.

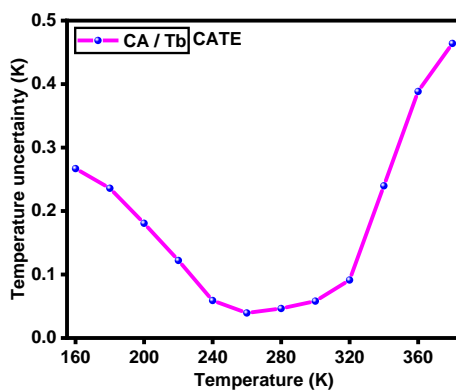

Fig. S112 Temperature uncertainty for CA / Tb in CATE.

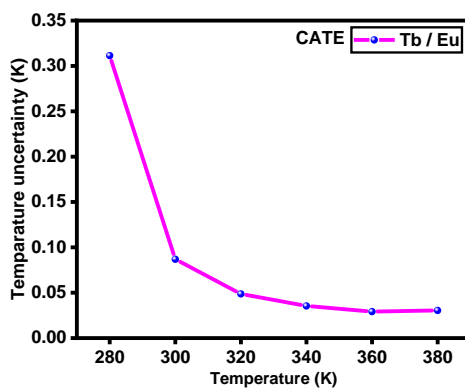

Fig. S113 Temperature uncertainty for Tb / Eu in CATE.

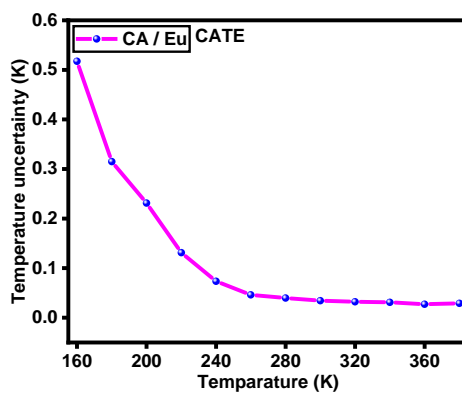

Fig. S114 Temperature uncertainty for CA / Eu in CATE
